# Supplementary material for: The Genome of Chelonid Herpesvirus 5 Harbors Atypical Genes
Source: PLoS One. 2012 Oct 2;7(10):e46623. doi: 10.1371/journal.pone.0046623 (PMC3462797; doi:10.1371/journal.pone.0046623)
Supplement: Table S1 — F-UL52 pairwise alignment. The accession numbers for the sequences used are Swiss-Prot: P28962.1 (EHV1); Q6X264 (BoHV5); Q65817 (BoHV1); Q5PP97 (SuHV1); Q85228 (SuHV1, Kaplan strain); A8T7D0 (HCMV); Q8QS36 (PaHV2); Q2QBC3 (CeHV16); Q9YZA1 (ILTV); Q782P1 (GaHV3); Q9E6M4 (GaHV2); Q9IBS6 (GaHV1); Q9DGY9 (MeHV1); B4XS04 (AnHV1). Taxonomic information. Alphaherpesviruses: Equid herpesvirus 1 (EHV1), Bovid herpesviruses 1 and 5 (BoHV1, BoHV5), Suid herpesvirus 1 (SuHV1; pseudorabies virus, PRV; SuHVK represents the Kaplan strain of PRV), Cercopithecine herpesvirus 16 (CeHV16; also known as papiine herpesvirus 2 of the baboons, which belongs to the genus simplex virus), Infectious laryngotracheitis virus (ILTV; Iltovirus of chickens), Melagrid herpesvirus 1 (MeHV1; Herpesvirus 1 of Turkeys), and Gallid herpesviruses types 1, 2, and 3 (GaHV1, 2, 3; Herpesviruses of chickens), Anatid herpesvirus 1 (AnHV1; alphaherpesvirus infecting ducks, geese and swans). Betaherpesviruses: Human cytomegalovirus (HCMV) and Panine herpesvirus 2 (PaHV2; cytomegalovirus of the chimpanzee). (XLSX) [file pone.0046623.s003.xlsx]

## Sheet: Blatt1
Table S1. F-UL52 pairwise alignement
UL52	Identiy count	SuHVK	SuHV1	BoHV1	BoHV5	CeHV16	AnHV1	EHV1	GaHV1	GaHV2	GaHV3	ILTV	MeHV1	F-UL52	PaHV2	HCMV
	Identity percent	1	2	3	4	5	6	7	8	9	10	11	12	13	14	15
SuHVK	1		962	481	503	458	402	436	346	361	362	362	360	280	104	95
SuHV1	2	100,00		481	503	458	402	436	346	361	362	362	360	280	104	95
BoHV1	3	43,49	43,49		905	436	411	424	371	384	378	378	362	266	97	92
BoHV5	4	44,99	44,99	82,88		451	419	455	383	396	393	393	384	291	96	93
CeHV16	5	41,30	41,30	38,01	39,35		429	413	374	387	390	390	387	274	112	110
AnHV1	6	34,45	34,45	34,77	35,30	36,14		438	413	428	430	430	423	269	98	92
EHV1	7	38,48	38,48	36,93	39,46	35,70	37,66		386	401	396	396	403	272	90	79
GaHV1	8	30,14	30,14	31,93	32,62	32,16	34,82	33,45		1047	698	698	658	256	102	93
GaHV2	9	31,45	31,45	33,05	33,73	33,28	36,09	34,75	97,40		718	718	677	264	102	95
GaHV3	10	31,64	31,64	32,59	33,56	33,53	36,26	34,29	64,69	66,60		1071	636	262	109	102
ILTV	11	31,64	31,64	32,59	33,56	33,53	36,26	34,29	64,69	66,60	100,00		636	262	109	102
MeHV1	12	31,28	31,28	31,13	32,71	33,30	35,67	34,86	60,70	62,51	58,73	58,73		272	102	92
F-UL52	13	25,43	25,43	23,11	25,35	24,46	22,91	23,96	22,38	23,08	23,00	23,00	23,78		81	76
PaHV2	14	9,95	9,95	8,63	8,47	10,26	8,33	7,99	9,12	9,12	9,78	9,78	9,10	7,86		398
HCMV	15	9,17	9,17	8,23	8,25	10,02	7,88	7,03	8,30	8,48	9,14	9,14	8,20	7,34	55,90
The accession numbers for the sequences used are Swiss-Prot: P28962.1 (EHV1); Q6X264 (BoHV5); Q65817 (BoHV1); Q5PP97 (SuHV1); Q85228 (SuHV1, Kaplan strain); A8T7D0 (HCMV); Q8QS36 (PaHV2); Q2QBC3 (CeHV16); Q9YZA1 (ILTV); Q782P1 (GaHV3); Q9E6M4 (GaHV2); Q9IBS6 (GaHV1); Q9DGY9 (MeHV1); B4XS04 (AnHV1).
Taxonomic information. Alphaherpesviruses: Equid herpesvirus 1 (EHV1), Bovid herpesviruses 1 and 5 (BoHV1, BoHV5), Suid herpesvirus 1 (SuHV1; pseudorabies virus, PRV; SuHVK represents the Kaplan strain of PRV), Cercopithecine herpesvirus 16 (CeHV16; also known as papiine herpesvirus 2 of the baboons, which belongs to the genus simplex virus), Infectious laryngotracheitis virus (ILTV; Iltovirus of…
