# Supplementary material for: The Genome of Chelonid Herpesvirus 5 Harbors Atypical Genes
Source: PLoS One. 2012 Oct 2;7(10):e46623. doi: 10.1371/journal.pone.0046623 (PMC3462797; doi:10.1371/journal.pone.0046623)
Supplement: Table S2 — F-lec pairwise alignment. The accession numbers for the sequences used are: XM_001499388 (EqCD69); P24765(VV-A40); AF302184 (RCMV lectin); AAC28421 (ASFV-8CR). Abbreviations: Eq, equine, horse; VV, vaccinia virus, reference strain WR; RCMV, rat cytomegalovirus; ASFV, african swine fever virus. (XLSX) [file pone.0046623.s004.xlsx]

## Sheet: Blatt1
Table S2. F-lec pairwise alignement
F-lec	Identiy count	F-lec2	EqCD69	F-lec1	VV-A40	RCMV lectin	ASFV-8CR
	Identity percent	1	2	3	4	5	6
F-lec2	1		50	42	26	25	30
EqCD69	2	23,70		46	32	39	23
F-lec1	3	19,81	22,44		28	34	24
VV-A40	4	12,62	15,09	13,93		29	37
RCMV lectin	5	12,38	17,33	15,81	14,36		35
ASFV-8CR	6	15,38	10,55	11,01	18,41	17,68
The accession numbers for the sequences used are: XM_001499388 (EqCD69); P24765(VV-A40); AF302184 (RCMV lectin); AAC28421 (ASFV-8CR).
Abbreviations: Eq, equine, horse; VV, vaccinia virus, reference strain WR; RCMV, rat cytomegalovirus; ASFV, african swine fever virus
