# Supplementary material for: The Genome of Chelonid Herpesvirus 5 Harbors Atypical Genes
Source: PLoS One. 2012 Oct 2;7(10):e46623. doi: 10.1371/journal.pone.0046623 (PMC3462797; doi:10.1371/journal.pone.0046623)
Supplement: Table S4 — F-sial pairwise alignment. The accession numbers for the sequences used are: M35027 (Rabbit Fibroma virus); U46577.1 (Myxoma virus); NC_006967.1 (Deerpox virus); XM_417860.2 (Gallus gallus); NM_006278.1 (Homo sapiens); Q9IZK2 (BoHV4); Q7YQE1 (Bos taurus); M96361.1 (Baculovirus); A4ZUA5 Ampullavirus; A93469.1 (Fowl adenovirus). (XLSX) [file pone.0046623.s006.xlsx]

## Sheet: Blatt1
Table S4. F-sial pairwise alignement
F-sial	Identiy count
	Identity percent	1	2	3	4	5	6	7	8	9	10	11
Rabbit Fibroma	1		231	120	104	105	91	47	48	37	32	20
Myxoma	2	79,66		122	109	108	88	53	54	40	34	18
Deerpox	3	38,96	39,61		113	118	88	49	48	36	33	18
Gallus	4	30,59	32,06	33,33		254	123	55	57	44	32	20
Homo	5	31,25	32,14	35,22	75,60		119	53	53	39	29	20
F-sial	6	27,91	26,99	27,08	36,39	35,95		55	53	32	32	13
BoHV4	7	10,61	11,96	11,01	12,04	11,60	12,22		415	56	26	11
Bos	8	10,84	12,19	10,79	12,47	11,60	11,78	94,32		55	26	11
Baculo	9	8,22	8,89	7,89	9,63	8,53	7,00	11,72	11,51		27	14
Ampulla	10	8,38	8,90	8,29	7,48	6,87	7,77	5,49	5,49	5,79		14
Fowl Adeno	11	6,17	5,56	5,39	5,45	5,51	3,67	2,36	2,36	3,09	4,32
The accession numbers for the sequences used are: M35027 (Rabbit Fibroma virus); U46577.1 (Myxoma virus); NC_006967.1 (Deerpox virus); XM_417860.2 (Gallus gallus); NM_006278.1 (Homo sapiens); Q9IZK2 (BoHV4); Q7YQE1 (Bos taurus); M96361.1 (Baculovirus); A4ZUA5 Ampullavirus; A93469.1 (Fowl adenovirus).
